1 **Intercellular extrachromosomal DNA copy number heterogeneity**  
2 **drives cancer cell state diversity**

3

4 Maja C Stöber<sup>1,2,3</sup>, Rocío Chamorro González<sup>5</sup>, Lotte Brückner<sup>5</sup>, Thomas Conrad<sup>1</sup>, Nadine  
5 Wittstruck<sup>1,5</sup>, Annabell Szymansky<sup>5</sup>, Angelika Eggert<sup>5</sup>, Johannes H Schulte<sup>5</sup>, Richard P  
6 Koche<sup>9</sup>, Anton G Henssen<sup>1,5,6,8,10\*</sup>, Roland F Schwarz<sup>4,6,1\*</sup>, Kerstin Haase<sup>5,7\*</sup>

7

8 <sup>1</sup>Berlin Institute for Medical Systems Biology at the Max Delbrück Center for Molecular  
9 Medicine in the Helmholtz Association, Berlin, Germany.

10 <sup>2</sup>Institute of Pathology, Charité – Universitätsmedizin Berlin, Corporate Member of Freie  
11 Universität Berlin and Humboldt-Universität zu Berlin, Berlin, Germany.

12 <sup>3</sup>Humboldt-Universität zu Berlin, Faculty of Life Science, 10099 Berlin, Germany.

13 <sup>4</sup>Institute for Computational Cancer Biology, Center for Integrated Oncology (CIO), Cancer  
14 Research Center Cologne Essen (CCCE), Faculty of Medicine and University Hospital  
15 Cologne, University of Cologne, Cologne, Germany.

16 <sup>5</sup>Department of Pediatric Oncology/Hematology, Charité-Universitätsmedizin Berlin,  
17 Germany.

18 <sup>6</sup>BIFOLD - Berlin Institute for the Foundations of Learning and Data, Berlin, Germany.

19 <sup>7</sup>German Cancer Consortium (DKTK), partner site Berlin, and German Cancer Research  
20 Center (DKFZ), Heidelberg, Germany.

21 <sup>8</sup>Berlin Institute of Health, 10178 Berlin, Germany.

22 <sup>9</sup>Center for Epigenetics Research, Memorial Sloan Kettering Cancer Center, New York, New  
23 York, USA.

24 <sup>10</sup>Experimental and Clinical Research Center (ECRC) of the MDC and Charité Berlin, Berlin,  
25 Germany.

26

27 Correspondence should be addressed to [henssenlab@gmail.com](mailto:henssenlab@gmail.com), [roland.schwarz@uni-](mailto:roland.schwarz@uni-koeln.de)  
28 [koeln.de](mailto:koeln.de), [kerstin.haase@charite.de](mailto:kerstin.haase@charite.de)

29

30 **Abstract**

31 Neuroblastoma is characterised by extensive inter- and intra-tumour genetic heterogeneity  
32 and varying clinical outcomes. One possible driver for this heterogeneity are  
33 extrachromosomal DNAs (ecDNA), which segregate independently to the daughter cells  
34 during cell division and can lead to rapid amplification of oncogenes. While ecDNA-mediated  
35 oncogene amplification has been shown to be associated with poor prognosis in many  
36 cancer entities, the effects of ecDNA copy number heterogeneity on intermediate  
37 phenotypes are still poorly understood.

38

39 Here, we leverage DNA and RNA sequencing data from the same single cells in cell lines  
40 and neuroblastoma patients to investigate these effects. We utilise ecDNA amplicon  
41 structures to determine precise ecDNA copy numbers and reveal extensive intercellular  
42 ecDNA copy number heterogeneity. We further provide direct evidence for the effects of this  
43 heterogeneity on gene expression of cargo genes, including *MYCN* and its downstream  
44 targets, and the overall transcriptional state of neuroblastoma cells.

45

46 These results highlight the potential for rapid adaptability of cellular states within a tumour  
47 cell population mediated by ecDNA copy number, emphasising the need for ecDNA-specific  
48 treatment strategies to tackle tumour formation and adaptation.

49

50 **Keywords:** extrachromosomal DNA, tumour heterogeneity, cell state diversity, copy  
51 number, neuroblastoma, single-cell RNA sequencing

52 **Introduction**

53 Paediatric neuroblastoma is a genetically heterogeneous tumour demonstrating a spectrum  
54 of different clinical outcomes (1,2). It is characterised by relatively few somatic nucleotide  
55 variants (SNVs) and known driver events, but considerable chromosomal instability and

56 somatic copy number alterations (SCNAs) (3,4). One key genetic alteration is frequent  
57 amplification of the *MYCN* oncogene, associated with unfavourable outcome and aggressive  
58 disease, which often occurs in the form of a high number of copies of one or multiple  
59 extrachromosomal DNA (ecDNA) amplicons (5,6).

60

61 EcDNAs form as the result of DNA damage, in particular double-strand breaks (7), which  
62 may occur on their own or as part of larger catastrophic events including chromothripsis (8).  
63 Despite lacking centromeres, ecDNAs can be maintained in circularised form in the nucleus,  
64 where they replicate proportionally with the chromosomes during S-phase and subsequently  
65 segregate independently and randomly to daughter cells upon cell division. When paired  
66 with a distinctive selective advantage, as in the case of *MYCN*, these random segregation  
67 patterns can lead to a rapid increase in the number of oncogene copies in the tumour cell  
68 population.

69

70 While ecDNA in cancer was first described over 50 years ago (9), its high prevalence  
71 amongst tumour types and the crucial role it plays in oncogene amplification and tumour  
72 evolution was only recently revisited (6,10–19). Importantly, ecDNA not only serves as a  
73 substrate for oncogene amplification and copy number heterogeneity, but also drives high  
74 oncogene expression by increasing copy number dosage, enhancing chromatin accessibility  
75 and by optimising enhancer topology (15,18,19).

76

77 These transcriptional effects possibly contribute to providing the tumour with increased  
78 plastic potential to evade therapeutic selection pressures and rapidly adapt to changing  
79 environmental conditions. Recent studies have leveraged fluorescence in-situ hybridisation  
80 (FISH) to visualise this increased genetic plasticity within individual tumours, where the  
81 number of ecDNA copies varies substantially between cell populations and clones (20).  
82 However, it is unclear if and to what extent these varying copy numbers affect cell states and  
83 influence cellular phenotypes within individual patients.

84

85 We here use a combination of previously published single-cell transcriptome data of  
86 neuroblastoma patients and newly derived single-cell genome-and-transcriptome (G&T) (21)  
87 and ecDNA-and-transcriptome (scEC&T) (22) sequencing of neuroblastoma cell lines and  
88 patients to address this issue. We demonstrate substantial transcriptional heterogeneity  
89 within individual neuroblastoma patients and provide evidence that ecDNA copy number  
90 variability is causally linked to these transcriptional changes. We believe that understanding  
91 the precise role that ecDNA plays in generating intra-tumour heterogeneity will not only  
92 enhance our understanding of cancer evolution as a whole, but will further inform our  
93 treatment strategies.

## 94 **Results**

### 95 Intra-patient *MYCN* expression heterogeneity is linked to distinct transcriptional states in 96 *MYCN*-amplified primary neuroblastomas

97 To assess the extent of transcriptional heterogeneity between individual cells in  
98 neuroblastoma, we first analysed gene expression data of twelve *MYCN*-amplified primary  
99 neuroblastoma samples using 10x single-nuclei RNA sequencing [Figure 1a]. To this end we  
100 combined samples collected locally at the Charité university hospital Berlin (N=4) with two  
101 published cohorts from the University Hospital of Cologne ((23) , N=4) and St. Jude's  
102 Hospital Memphis (<https://scpca.alexslimonade.org/>), N=4) [Table S1, Additional File 2].

103

104 We annotated cell types by combining principal component analysis (PCA) with canonical  
105 marker gene expression (Methods) obtained from (23) and quantified endothelial cells,  
106 immune cells, mesenchymal cells and tumour cells for all patients. Samples across the  
107 cohort showed an overall high tumour cell content (average 86%, +/- 21), in line with  
108 previous findings (23,24). Most samples consisted of a substantial proportion of immune  
109 cells (average 5%, +/- 9), and varying degrees of endothelial (average 4%, +/- 3) and

110 mesenchymal cells (average 4%, +/- 4) [Table S2, Additional File 2]. Transcriptional profiles  
111 were visually inspected using UMAP per patient, which confirmed separation of cell types  
112 into distinct clusters [Figure S1a, Additional File 1], and all non-tumour cells were excluded  
113 for downstream analyses.

114

115 To obtain an in-depth characterisation of the transcriptional landscape of *MYCN*-amplified  
116 neuroblastomas and to investigate its heterogeneity, we next identified transcriptional  
117 programs (modules) for each patient using non-negative matrix factorisation (cNMF (25),  
118 Methods). We chose an optimal number of modules per patient based on a trade-off  
119 between module stability and reconstruction error (Methods) and identified 106  
120 transcriptional programs across the cohort (mean 9 [6 - 12]). To investigate commonalities  
121 between patients, we performed pairwise Pearson correlation analysis of all modules  
122 followed by hierarchical clustering [Figure 1c] and identified 3 meta modules which were  
123 further split into 10 sub modules (Methods, [Figure S1b, Additional File 1]). Thirty-one  
124 modules without significant correlation to at least 50% of other modules were considered  
125 uncommon and removed from downstream analyses. Average gene activity scores for each  
126 meta and submodule followed by gene set enrichment analysis (GSEA) revealed high  
127 activity of genes involved in cell cycle progression and cell division for Meta Module 1 (e.g.,  
128 *KIF18B*, *ASPM*, *KIF14*), in line with recent findings in other cancer entities (26). In particular,  
129 submodules of this cell cycle meta module showed enrichment of replication (S1) and cell  
130 division (S8). Meta module 2 was strongly enriched for genes involved in ribosome  
131 biogenesis and the third meta module contained genes associated with cell-cell interactions  
132 (e.g., *CNTN5*, *TENM2*, *CTNNA2*). The submodules of the ribosome meta module showed  
133 enrichment of genes involved in translation (S2), post-transcriptional regulation (S6) and  
134 cellular response to stress (S10). The cell-cell interaction meta module was divided into  
135 submodules associated with neuronal differentiation (S3), sensory perception (S4),  
136 regulation of cell size (S5), axonogenesis (S7) and synaptic signalling (S9) [Figure 1d; Table  
137 S3, Additional File 2].

138

139 Recent large-scale efforts into transcriptional cell states pan-cancer have identified cell-cycle  
140 related modules, but not any associated with ribosome biogenesis or cell-cell interactions  
141 (26). We thus hypothesised that the latter modules might be specific to neuroblastoma  
142 biology and indicative of *MYCN*-mediated upregulation of ribosome biogenesis (27,28) and  
143 downregulation of neurogenesis (29). To assess this, we correlated *MYCN* expression levels  
144 with module activity for all patients and observed higher average correlation scores with  
145 modules grouped into the ribosomal biogenesis meta module 2, as opposed to cell cycle or  
146 cell-cell interaction [Figure 1f]. The direct association between *MYCN* expression and  
147 ribosomal biogenesis activity was further confirmed by visual inspection of UMAPs with meta  
148 module activity and *MYCN* expression overlaid respectively [Figure 1b, e].

149

150 Interestingly, within the cell cycle meta module we found the sub module associated with  
151 replication pathways and the G1/S transition pathway (S1) to be positively correlated with  
152 *MYCN* expression, while the sub module associated with cell division (S8) was negatively  
153 correlated with *MYCN* [Figure S1c, Additional File 1]. Investigating canonically expressed  
154 cell cycle marker genes for each cell (30), we found cells with high activity of the cell cycle  
155 meta module 1 to be predominantly in G2M and S phase [Figure S1d, Additional File 1] in  
156 line with the role of *MYCN* in cellular proliferation (31). *MYCN* expression was further  
157 significantly associated with cell cycle phase in 7 out of 12 samples. In the remaining 5  
158 samples the number of detected features and reads was significantly lower on average to  
159 those samples with association, suggesting technical rather than biological effects as a  
160 potential cause for this lack of association [Figure S1e, Additional File 1].

161

162 Taken together, we observe substantial transcriptional heterogeneity and distinct  
163 transcriptional states of cells within individual patients directly associated with and potentially  
164 causally linked to heterogeneous *MYCN* expression levels.

165 Intra-patient *MYCN* expression heterogeneity is biologically functional and consistent  
166 between patients

167 To confirm that the observed *MYCN* expression heterogeneity is biologically functional, we  
168 next grouped cancer cells into discrete groups with high (*MYCN*-high), intermediate (*MYCN*-  
169 med) and low (*MYCN*-low) *MYCN* expression levels based on the top and bottom 30%  
170 expression quantiles per patient. Differential gene expression analysis between *MYCN*-high  
171 and *MYCN*-low cells [Figure 2a, b] showed an average *MYCN* log<sub>2</sub> fold change of 1.613  
172 (1.138 - 2.132). Next, we ranked all genes according to their fold change and tested whether  
173 known *MYCN* target genes (32) were enriched in this ordered list using GSEA, which was  
174 the case in 11 out of 12 patients. This consistent differential activity of *MYCN* target genes  
175 indicates that observed *MYCN* expression differences may affect expression of downstream  
176 *MYCN* targets [Figure 2c inset] and strongly suggests that the observed *MYCN* variability is  
177 biologically functional. Additionally, the normalised enrichment score (NES) of *MYCN* target  
178 genes was significantly correlated with the difference in gene expression between *MYCN*-  
179 high and *MYCN*-low cells (Pearson correlation,  $p = 0.0043$ ), indicating a direct connection  
180 between the degree of *MYCN* expression variability and the observed differences in  
181 downstream *MYCN* target activity [Figure 2c].

182

183 To identify additional differences between *MYCN*-high and *MYCN*-low cells, we performed  
184 GSEA on gene ontology (GO) biological processes and identified a set of 38 pathways that  
185 were recurrently enriched in every single patient and positively associated with *MYCN*  
186 expression. These 38 pathways include ribosome biogenesis, RNA catabolic processes,  
187 protein targeting, peptide biosynthetic and viral processes [Figure 2d,e; Table S4, Additional  
188 File 2; Table S5, Additional File 3]. To investigate how these 38 recurrent pathways relate to  
189 the transcriptional cell states identified above, we performed a meta pathway enrichment  
190 analysis (Methods) [Figure 2f]. Briefly, all GO terms were ranked according to their averaged  
191 NES in each meta module and this ranked list was tested for enrichment for each of the 38

192 original pathways. The ribosome meta module 2 and its sub modules showed a strong  
193 positive association with all 38 pathways similar to MYCN-high cells [Figure 2e,f], whereas  
194 the cell-cell interaction module 3 and cell-cycle module 1 showed a strong negative  
195 association.

196

197 We further investigated whether MYCN-high and -low cells expressed signatures of  
198 mesenchymal and adrenergic differentiation states (33,34). Overall, all samples in the 3  
199 cohorts primarily expressed the adrenergic signature. We found cells with high *MYCN*  
200 expression to show lower expression of adrenergic features but also lower expression of  
201 mesenchymal features than cells with low *MYCN* expression [Figure S1f, Additional File 1].  
202 In conclusion, we do not find any evidence for adrenergic to mesenchymal state transition  
203 driven by *MYCN* expression within individual patients.

204

205 The enriched pathways demonstrate biological functionality of the observed *MYCN*  
206 expression heterogeneity on the single-cell level and its consistency across a cohort of  
207 *MYCN*-amplified primary neuroblastomas. We describe its association with changes in  
208 ribosomal activity and cell-cell interaction and to a weaker degree with cell cycle transition,  
209 potentially indirectly through co-activation of other cancer pathways (26).

210 *MYCN*-amplified neuroblastoma cells show high inter-cellular ecDNA copy number  
211 heterogeneity

212 One potential cause of the observed *MYCN* gene expression heterogeneity are variations in  
213 copy number, possibly driven by ecDNA (6,20,35). Unequal mitotic segregation of ecDNA  
214 can lead to high inter-cellular copy number heterogeneity, but the extent of this  
215 heterogeneity within patients remains unclear.

216

217 We therefore performed genome and transcriptome (G&T) sequencing of one primary  
218 neuroblastoma (N=96 cells) and two neuroblastoma cell lines CHP212 (N=96 cells) and



219 TR14 (N=192 cells)), which are known to harbour ecDNA-linked *MYCN* amplifications.  
220 Additionally, we performed single-cell scEC&T-seq (22) on the same patient sample (N=96  
221 cells) and cell lines (CHP212 (N=170 cells) and TR14 (N=42 cells)), to confirm the presence  
222 of ecDNA and to determine ecDNA-amplified regions in the genome [Figure 3a]. We  
223 hypothesised that ecDNA-amplified regions show patient- or cell-line specific amplification  
224 and expression patterns and that ecDNA copy number variation is the main contributor to  
225 *MYCN* expression heterogeneity.

226

227 Previous investigations into the ecDNA amplicon structures in CHP212 and TR14 (18) and  
228 patient 8 (22) revealed that the CHP212 cell line contains one single circular amplicon of  
229 size 1.7Mb containing genes *LPIN1*, *TRIB2*, *DDX1* and *MYCN*. In contrast, TR14 contains  
230 three different circular amplicons 710, 475 and 1,000 kbp in size respectively, harbouring  
231 together over 29 genes of which we only consider those containing the known  
232 neuroblastoma oncogenes *MYCN*, *CDK4* and *MDM2* [Figure 3b]. The ecDNA amplicon  
233 structure in patient 8 is 500 kbp long and only contains *MYCN* [Figure S2b, Additional File 1].  
234 The varying amplicon structures were also clearly visible from overall read coverage in DNA  
235 sequencing [Figure 3a, track “DNA”].

236

237 We next determined global copy number profiles for each single cell from G&T sequencing  
238 using Ginkgo (36), and then refined those copy number profiles by leveraging previously  
239 reconstructed precise ecDNA breakpoints (Methods) (18,22). Genomic regions that  
240 contained these oncogenes on ecDNA showed extensive copy number heterogeneity across  
241 cells within a single cell line and patient, whereas regions that were not on ecDNA did not  
242 [Figure 4a]. The *MYCN* locus in CHP212 showed on average a copy number of 50 (range 3 -  
243 353), for the *MYCN* locus in TR14 the average copy number was estimated at 105 (range 6 -  
244 852). The copy number of the *MYCN* amplicon locus in patient 8 was on average 191 (range  
245 5 - 916) [Figure S2c, Additional File 1]. For a full overview of the copy number states and  
246 expression levels for all genes considered, please refer to [Table S6,S7, Additional File 2].

247 To confirm the presence of ecDNA and to validate the copy number estimates, we  
248 performed FISH by staining centromeres and genomic regions containing *MYCN*, *CDK4* and  
249 *MDM2* [Figure S2a, Additional File 1] (Methods). FISH in metaphase spreads confirmed the  
250 presence of ecDNA in all cases, and copy number estimates from FISH in interphase cells  
251 showed distributions similar to those obtained from sequencing [Figure 4a].

252

253 In TR14, the *MYCN* locus is present in two different ecDNA amplicons, which raises the  
254 question whether one amplicon contributes more copies to the total *MYCN* copy number  
255 than the other. We thus estimated the fraction of copies contributed per amplicon by  
256 leveraging additional non-overlapping loci on the amplicon and distributing the *MYCN* copy  
257 number accordingly (Methods). The amplicon containing only *MYCN* was substantially larger  
258 and contributed more copies than the amplicon containing both *MYCN* and *CDK4*. However,  
259 when comparing the number of *MYCN*-only amplicons to the largest amplicon in this cell line  
260 carrying *MDM2*, we found two thirds of the cells to harbour more ecDNA containing *MYCN*  
261 than *MDM2*, suggesting that amplicon size alone does not equate to ecDNA copy number.

262

263 We next investigated whether the observed copy number heterogeneity is reflected on the  
264 transcriptional level by leveraging RNA expression readouts from the same single-cells. Due  
265 to the cell lines' unique amplicon structures, different genes can be amplified on ecDNA. As  
266 expected, we observed increased gene expression levels in genes present on the ecDNA  
267 including *MYCN*, *DDX1*, *TRIB2* and *LPIN1* in CHP212 and *MYCN*, *CDK4* and *MDM2* in  
268 TR14. In contrast, genes not present on their respective amplicons showed only low overall  
269 levels of expression. For an example, consider *MDM2*, *CDK4* in the CHP212 cell line in  
270 [Figure 3b, track "RNA"]. Thus, significant inter-cellular ecDNA copy number heterogeneity  
271 occurs in neuroblastoma cells.

272 Inter-cellular ecDNA copy number heterogeneity drives transcriptional states in  
273 neuroblastoma cells

274 Pan-cancer analyses have recently confirmed that copy number is a main driver of aberrant  
275 gene expression across human cancers (37). Since ecDNA presence can lead to  
276 exceptionally high copy number levels (10,16), we leveraged the combined genome and  
277 transcriptome data from G&T and scEC&T sequencing to investigate whether the observed  
278 inter-cellular ecDNA copy number heterogeneity is reflected in the transcriptome.

279

280 Overall we found strong positive correlations between ecDNA copy number and mRNA  
281 expression across all genes contained on the ecDNA amplicons [Figure 4b; Figure S3a,b,  
282 Additional File 1]. Gene expression measured in TPM increased linearly with ecDNA copy  
283 number, explaining gene expression variability on average by 42% (median: 47, range 2.5 -  
284 76) in CHP212 and by 25% (median: 22, range 0.2 - 66) in TR14. Interestingly, effect sizes  
285 differed significantly between genes on amplicons, but also between cell lines for the same  
286 gene [Table S8, Additional File 2]. This sample- and gene-specific dosage effect of ecDNA  
287 copy number suggests other regulatory mechanisms to be involved in gene expression  
288 heterogeneity such as chromatin conformation, enhancer hijacking and ecDNA hub  
289 formation (15,18,38).

290

291 To ascertain that this dosage effect is truly driven by ecDNA, we exploited the linear  
292 relationship of ecDNA copy number and gene expression to build a gene-wise sample-  
293 specific linear model from the G&T-seq data [Table S8, Additional File 2]. We then predicted  
294 copy number from gene expression in cells sequenced with scEC&T-seq, for which absolute  
295 copy number measurements are not readily available, and observed a strong correlation of  
296 the predicted copy number with the number of ecDNA reads in a region covering that gene  
297 [Figure S3c, Additional File 1]. This strongly suggests that the observed gene dosage is

298 indeed caused by ecDNA copy number which ultimately drives the increase in gene  
299 expression in the analysed samples.

300

301 To confirm that the observed expression differences found in the high-throughput 10X  
302 patient cohort might be plausibly linked to ecDNA, we repeated the above analysis on the  
303 cell lines by considering the transcriptomes from both G&T and scEC&T data. We once  
304 again stratified cells into *MYCN* high and low expressing cells (30% quantile) and tested for  
305 differential gene expression between both groups. In CHP212, *MYCN*, *LPIN1*, *DDX1* and  
306 *TRIB2* were consistently identified, in line with CHP212 containing a single ecDNA  
307 containing those genes [Figure 3b]. Interestingly, in TR14 only *MYCN* itself and one  
308 additional, non-amplified gene (*E2F1*), were identified, likely due to the relative  
309 overabundance of the ecDNA amplicon containing only *MYCN* compared to the two  
310 alternative circle structures present in the cell line [Figure 3b; Table S9,S10, Additional File  
311 2].

312

313 As previously, we ranked the genes based on their expression difference and then  
314 performed GSEA for GO biological processes. Consistent with our observations in the high-  
315 throughput patient data we observed elevated *MYCN* target gene expression in *MYCN*-high  
316 cells [Figure 4c; Figure S3d, Additional File 1] which supports our previous result of  
317 functional *MYCN* heterogeneity in patients. Among the 38 identified pathways enriched in  
318 *MYCN*-high cells in patients, 5 and 17 pathways were also significantly positively enriched in  
319 CHP212 and TR14 respectively [Figure 4d; Table S11, Additional File 2] including the  
320 ribosome biogenesis pathway.

321

322 In summary, we observed similar transcriptional patterns in the patient cohort as compared  
323 to the cell lines for which we have established a clear link to ecDNA presence.

## 324 **Conclusions/Discussion**

325 The role of ecDNA in the development of malignant phenotypes has been explored in recent  
326 studies which uncovered ecDNA-associated poorer survival and treatment resistance  
327 (13,15,39). We here use genomic and transcriptomic information from the same single cells  
328 to link *MYCN*-amplifications on ecDNA to downstream transcriptional effects and cell states.  
329 We show that ecDNA-mediated intercellular heterogeneity of *MYCN* expression within  
330 patients creates various co-existing cellular subpopulations with differing transcriptional  
331 states. We demonstrate changes in key pathways including ribosome biogenesis and cell-  
332 cell interaction, a potential substrate for rapid adaptation to environmental changes including  
333 treatment [Figure 4e].

334

335 Our characterization of transcriptional programs in *MYCN*-amplified neuroblastoma revealed  
336 3 recurring meta pathways across 12 patients, which are associated with cell cycle,  
337 ribosome biogenesis and cell-cell interaction. While the cell cycle module was also found in  
338 recent investigations pan-cancer (26), the lack of ribosome biogenesis in this study might  
339 indicate that it is neuroblastoma specific. We demonstrated functional intra-patient *MYCN*  
340 expression heterogeneity across the cohort leading to upregulation of ribosome biogenesis  
341 and deregulation of neurogenesis genes within individual patients, effects that were  
342 previously only described in bulk between patients or cell lines with varying *MYCN*  
343 expression (32), (27,28)(29). Future work will need to elaborate to what extent this  
344 heterogeneity can be found in non-*MYCN*-amplified neuroblastoma or in tumours harbouring  
345 other forms of amplification, such as homogeneously staining regions.

346

347 Surprisingly, not all individuals showed significant associations between *MYCN* expression  
348 levels and cell cycle phase, although it has been shown that *MYCN* amplification is  
349 associated with the cells ability to escape G1 phase (40,41). This might be explained by the

350 varying degrees of MYCN expression heterogeneity in our cohort, where in some patients  
351 phenotypic effects might be weaker and remain undetected.

352

353 To investigate the role of ecDNA in the observed transcriptional heterogeneity, we inferred  
354 ecDNA amplicon-specific copy number from single-cell DNaseq data. While FISH followed  
355 by semi-automated counting of fluorescent markers remains the gold standard for ecDNA  
356 detection, the technique is limited by the 2D nature of the images and can underestimate  
357 ecDNA copy number due to stacking of cells. We show that single-cell DNA sequencing is  
358 sufficiently accurate to recapitulate amplicon boundaries and that, depending on the  
359 amplicon architecture, accurate ecDNA copy numbers can be derived from read counts by  
360 combining general copy number calling methods (36) with a custom inference algorithm.  
361 However, naturally, such efforts are dependent on the quality of the output of the copy  
362 number calling algorithm.

363

364 Another possible source of noise is the integration of different sequencing technologies in  
365 our cohort, in particular single-nuclei sequencing in patients with single-cell sequencing in  
366 cell lines. While both approaches were found to be comparable with similar sensitivity (42–  
367 44), single-nuclei sequencing can be prone to a higher gene dropout rate, which might affect  
368 the size of the discovered gene sets. However, we also found a generally good agreement  
369 between approaches and sequencing technologies in this study.

370

371 In conclusion, we were able to associate cell state heterogeneity in *MYCN*-amplified  
372 neuroblastomas with ecDNA copy number heterogeneity, implying that the rapid evolutionary  
373 dynamics associated with ecDNA (20) have the potential to also enable rapid phenotypic  
374 adaptation potentially within a single cell division cycle. One important question is thereby  
375 whether the relationship between the number of ecDNA copies and the transcriptional  
376 effects and its function are linear, and if and where there is an upper limit to the fitness  
377 advantage accrued through ecDNA accumulation. Arguably, the replicative and metabolic

378 burden inferred by excessive ecDNA copy numbers will likely lead to diminishing returns in  
379 terms of clonal fitness beyond a certain level. However, in our study we observed largely  
380 linear relationships between ecDNA copy number and transcriptomic output within the  
381 observed copy number range. Additionally, we could show that increases in *MYCN* target  
382 gene expression activity are linearly correlated with *MYCN* expression fold change increase,  
383 suggesting that additional ecDNA copies continue to linearly affect oncogene function within  
384 the range of copy numbers observed in real tumours and cell lines. Additional experiments  
385 will need to investigate whether this linear increase directly translates to an increase in  
386 biological function, for example by increasing cell growth and proliferation through  
387 upregulation of ribosome biogenesis.

388

389 Treatment strategies targeting downstream effects of ecDNA-mediated pathways have been  
390 shown to lead to therapy resistance or recurrence after the treatment ended (14), likely  
391 because of rapid re-emergence of cells with high ecDNA copy number. Investigating the  
392 ecDNA evolution and associated cellular states during and after treatment could potentially  
393 uncover new treatment strategies.

## 394 **Figures**

### 395 **Figure 1: Cellular state heterogeneity in *MYCN*-amplified neuroblastomas**

396 **A:** Schematic of available data and sample preparation of 12 *MYCN*-amplified  
397 neuroblastoma patients with single-nuclei RNA-seq (10X genomics) and workflow; **B:** UMAP  
398 of 4,641 single-nuclei of patient 1, tumour cells coloured by *MYCN* expression level; **C:**  
399 Heatmap of Pearson correlation coefficients of TPM Z-scores of patient derived modules  
400 from non-negative matrix factorization, rows coloured by meta and sub modules, columns  
401 coloured by patient of origin; **D:** Heatmap of average TPM Z-score across sub modules of  
402 meta module defining genes; **E:** UMAPs of patient 1 coloured according to corresponding  
403 meta module activity; **F:** Correlation of *MYCN* expression and patient derived modules,  
404 grouped by meta modules

405

406 **Figure 2: Functional *MYCN* expression heterogeneity in *MYCN*-amplified**  
407 **neuroblastoma**

408 **A:** *MYCN* expression distribution of patient 1 coloured by *MYCN* groups; **B:** Workflow  
409 schematic of DEG and GSEA **C:** Correlation of *MYCN* expression difference between  
410 *MYCN*-high and *MYCN*-low cells and normalised enrichment score of *MYCN* target genes  
411 per patient, colours represent the negative logarithmic adjusted p-value of the enrichment,  
412 Pearson correlation coefficient and p-value are given as inset, inset: GSEA of *MYCN* target  
413 genes, genes decreasingly ordered by logarithmic fold change derived from differential gene  
414 expression analysis between *MYCN*-high and *MYCN*-low cells in patient 1; **D:** Barplot of the  
415 number of pathways recurrently positive (red) or negative (green) enriched in the respective  
416 number of patients; **E:** Network of 38 recurring pathways enriched in cells with high *MYCN*  
417 expression across all 12 patients, edges refer to similarity of underlying gene set over a  
418 threshold, line type corresponds to kappa score referring to the number of overlapping genes  
419 in the gene set, colours highlight manual set summary term, some labels omitted for better  
420 readability, full list can be accessed in [Table S5, Additional File 3]; **F:** Meta pathway  
421 enrichment of 38 GO-Terms in ranked average NES list of meta modules and sub modules

422

423 **Figure 3: EcDNA amplicon structures in neuroblastoma cell lines**

424 **A:** Two *MYCN*-amplified neuroblastoma cell lines, TR14 and CHP212, with G&T-seq and  
425 scEC&T-seq; **B:** Mean scDNA-seq read coverage of selected regions on chromosomes 2  
426 and 12; amplicon boundaries from scEC-seq (red); schematic of ecDNA amplicons in  
427 CHP212 and TR14; distribution of gene expression (TPM) for CHP212 and TR14 cells of  
428 *LPIN1*, *TRIB2*, *DDX1*, *MYCN*, *CDK4* and *MDM2*.

429

430 **Figure 4: EcDNA copy number heterogeneity in neuroblastoma cell lines**

431 **A:** Distribution of ecDNA amplicon copy number adapted from Ginkgo copy number profiles  
432 (500kb bin size) from single-cell whole genome sequencing (dark) and distribution of foci



433 counts from FISH (light) for *MYCN* in CHP212 and *MYCN*, *CDK4* and *MDM2* in TR14); **B**:  
434 Correlation of gene expression and copy number of *MYCN* in CHP212, Pearson correlation  
435 coefficient and p-value are given as inset; **C**: GSEA of *MYCN* target genes, genes  
436 decreasingly ordered by logarithmic fold change derived from differential gene expression  
437 analysis between *MYCN*-high and *MYCN*-low cells in CHP212; **D**: NES of significantly  
438 enriched recurring pathways in patients per cell line; **E**: Schematic of summarising results

## 439 **Methods**

### 440 Cell culture

441 Human cancer cell line CHP212 was obtained from the American Type Culture Collection  
442 (ATCC; Manassas, VA, USA) and cancer cell line TR14 was kindly provided by J. J.  
443 Molenaar (Princess Máxima Center for Pediatric Oncology, Utrecht, Netherlands). Cells  
444 were tested for *Mycoplasma sp.* contamination with a Lonza MycoAlert system (Lonza) and  
445 absence of contamination was confirmed biweekly. STR genotyping (Genetica DNA  
446 Laboratories and IDEXX BioResearch) was performed to confirm the identity of both cell  
447 lines. For cell culture, we used RPMI-1640 medium (Thermo Fisher Scientific) supplemented  
448 with 1% penicillin, streptomycin, and 10% FCS. Cell viability was assessed with 0.02%  
449 trypan blue (Thermo Fisher Scientific) mixed in a 1:1 ratio, and counted with a BioRad TC20  
450 cell counter.

### 451 Patient samples and clinical data access

452 This study comprised the analyses of tumour and blood samples of patients diagnosed with  
453 neuroblastoma between 1991 and 2016. Specimens and clinical data were archived and  
454 made available by Charité-Universitätsmedizin Berlin or the National Neuroblastoma  
455 Biobank and Neuroblastoma Trial Registry (University Children's Hospital Cologne) of the  
456 GPOH. The *MYCN* gene copy number was determined as a routine diagnostic method using

457 FISH. DNA and total RNA were isolated from tumour samples with at least 60% tumour cell  
458 content as evaluated by a pathologist.

#### 459 Preparation of Metaphase spreads and FISH

460 Cells were cultured in a 15 cm dish and grown to 80% confluency. Metaphase arrest was  
461 performed by adding KaryoMAX™ Colcemid™ (10 µL/mL, Gibco) and incubating for 1-2  
462 hours. Afterwards, we washed the cells with PBS, trypsinized and centrifuged at 200 g for 10  
463 min. We slowly added a total of 10 mL of 0.075 M KCl preheated at 37 °C, one mL at a time  
464 and vortexing at maximum speed in between. Cells were then incubated for 20 min at 37 °C.  
465 For cell fixation, we added 5 mL of ice-cold 3:1 MeOH/acetic acid (kept at -20 °C), one mL at  
466 a time and resuspending the cells by flicking the tube. We centrifuged the sample at 200 g  
467 for 5 min. We repeated this step of addition of the fixate followed by centrifugation four times.  
468 Finally, two drops of cells within 200 µL of MeOH/acetic acid were added onto prewarmed  
469 slides from a height of 15cm and slides were incubated overnight. We fixed the slides in  
470 MeOH/acetic acid for 10 min at -20 °C and washed them in PBS for 5 min at room  
471 temperature (RT). We incubated the slides in pepsin solution (10 µL pepsin (1 g / 50 mL) in  
472 0.001N HCl) at 37 °C for 10 min and washed in 0.5x SSC buffer for 5 min. Dehydration of  
473 the slides was performed by 3-minutes washes in 70%, 90% and 100% cold ethanol (stored  
474 at -20 °C). After drying, we stained the slides with 10 µL of Vysis LSI N-MYC  
475 SpectrumGreen/CEP 2 SpectrumOrange Probes (Abbott), ZytoLight ® Spec CDK4/CEN12  
476 Dual Color Probe (ZytoVision) or ZytoLight ® SPEC MDM2/CEN 12 Dual Color Probe  
477 (Zytovision), covered with a coverslip and sealed with rubber cement. The probes were  
478 denatured by incubation at 72 °C for 5 min in a Thermobrite (Abbott) followed by overnight  
479 incubation at 37°C. We washed the slides for 5 min in 2x SSC/0.1% IGEPAL at RT followed  
480 by a 3-minutes wash at 60 °C in 0.4x SSC/0.3% IGEPAL (Sigma-Aldrich Inc.), and an  
481 additional 3-minutes wash in 2x SSC/0.1% IGEPAL at RT. After drying, we used 12 µL  
482 Hoechst 33342 (10 µM, Thermo Fisher Scientific) to stain the slides for 10 min, followed by a

483 wash with PBS for 5 min. Once the slides were completely dried, a coverslip was mounted  
484 and sealed with nail polish. Images were taken using a Leica SP5 Confocal microscope.

#### 485 Interphase FISH

486 TR14 cells for interphase FISH were grown in 8-chamber slides (Thermo Scientific™ Nunc™  
487 Lab-Tek™) to 80 % confluence. Wells were fixed in MeOH/acetic acid for 20 min at -20 °C  
488 followed by a wash of the slide in PBS for 5 min at room temperature (RT). The wells were  
489 removed and digestion of the slides was done in Pepsin solution (0.001 N HCl) with the  
490 addition of 10 µl pepsin (1 gr/50 mL) at 37 degrees for 10 min. Slides were washed in 0.5x  
491 SSC for 5 min and dehydrated by washing in 70 %, 90 % and 100 % cold ethanol stored at -  
492 20 °C (3min each). Dried slides were stained with either a 5 µl of Vysis LSI N-MYC  
493 SpectrumGreen/CEP 2 SpectrumOrange Probes (Abbott), ZytoLight ® Spec CDK4/CEN12  
494 Dual Color Probe (ZytoVision) or ZytoLight ® SPEC MDM2/CEN 12 Dual Color Probe  
495 (Zytovision), covered with a coverslip and sealed with rubber cement. Denaturing occurred in  
496 a Thermobrite (Abbott) for 5min at 72 °C followed by 37 °C overnight. The slides were  
497 washed for 5 min at RT within 2x SSC/0.1 % IGEPAL, followed by 3 min at 60 in 0.4x  
498 SSC/0.3 % IGEPAL (Sigma-Aldrich Inc.) and further 3 min in 2x SSC/0.1 % IGEPAL at RT.  
499 Dried slides were stained with 12 µl Hoechst 33342 (10 µM, Thermo Fisher) for 10 min and  
500 washed with PBS for 5 min. After drying, a coverslip was mounted on the slide and sealed  
501 with nail polish. Images were taken using a Leica SP5 Confocal microscope and analysed  
502 using the FIJI find maxima function.

#### 503 Nuclei isolation

504 For nuclei isolation, tissue samples were added in 1mL of ice-cold EZ PREP buffer (Sigma)  
505 and homogenised using a pre-cooled glass dounce tissue homogenizer (Wheaton). We used  
506 ten strokes with the loose pestle followed by 5 strokes with the tight pestle for adequate  
507 tissue homogenization. The sample was kept on ice at all times during homogenization to  
508 avoid heat generation caused by friction. After homogenization, we filtered the sample using

509 a BD Falcon tube with a 35µm cell strainer cap (Becton Dickinson). To estimate the number  
510 of intact nuclei, we stained with 0.02% trypan Blue (Thermo Fisher Scientific) in a 1:1 ratio.

#### 511 Fluorescence-activated cell sorting (FACS)

512 One to ten million neuroblastoma cells were stained with Propidium Iodide (PI, Thermo  
513 Fisher Scientific) in 1× PBS, and viable cells selected based on the forward and side  
514 scattering properties as well as PI staining. Nuclei suspensions were stained with DAPI  
515 (Thermo Fisher Scientific, final concentration 2 µM). For plate-based single-cell sequencing,  
516 viable cells were sorted using a FACS Aria Fusion flow cytometer (Biosciences) into 2.5 µL of  
517 RLT Plus buffer (Qiagen) in low binding 96-well plates (4titude) sealed with foil (4titude) and  
518 stored at -80 °C until processing. For droplet-based single-nuclei RNA-seq, DAPI-positive  
519 nuclei were sorted using a FACS Aria Fusion flow cytometer (Biosciences) into 20 µL of 4%  
520 (w/vol) Bovine Serum Albumin (BSA; Sigma) in 1× PBS, supplemented with 2 µL of RNase-  
521 In (40 U/µL; Life Technologies) and 2 µL of SUPERase-In (20 U/µL; Life Technologies).

#### 522 Droplet-Based snRNA-seq

523 Droplet-based single-nuclei RNA-seq was performed using the 10x Genomics Chromium  
524 Single Cell 3' Kit (v.3.1) following the manufacturer's protocol (45). For single nuclei gel  
525 bead-in-emulsions (GEMs) generation, we aimed for a target output of 10,000 nuclei for  
526 each sample. The amplified cDNA and final libraries were evaluated on a 4200 TapeStation  
527 (Agilent Technologies) using the HS-D5000 and HS-D1000 High Sensitivity DNA kits  
528 (Agilent Technologies), respectively. snRNA-seq libraries were sequenced on an Illumina  
529 NovaSeq 6000.

### 530 G&T-seq and scEC&T-seq

531 For plate-based single-cell sequencing, physical separation of genomic DNA and mRNA,  
532 and cDNA generation was performed as described in the G&T-seq protocol by Macaulay et  
533 al. (21). For G&T-seq, single-cell's gDNA was purified using 0.8x AMPure XP beads  
534 (Beckman Coulter) and genomic DNA amplification was carried out using the PicoPLEX  
535 Single Cell WGA kit v3 (Takara) and following the manufacturer's instructions. For scEC&T-  
536 seq, the purified gDNA was subjected to exonuclease digestion and rolling-circle  
537 amplification as previously described (22). All single-cell libraries were prepared using the  
538 NEBNext Ultra II FS kit (New England Biolabs) following the manufacturer's instructions but  
539 using one-fourth volumes. Unique dual index primer pairs (New England Biolabs) were used  
540 to barcode single-cell libraries. Pooled libraries were sequenced on a HiSeq 4000 instrument  
541 (Illumina) or a NovaSeq 6000 instrument with 2x 150bp paired-end reads for genomic DNA  
542 and circular DNA libraries and 2x 75 bp paired-end reads for cDNA libraries.

### 543 Single-nuclei RNA-seq processing

544 10x Genomics Cell Ranger v.5.0.1 was used to quantify the sequencing reads against the  
545 human genome build 38 (hg38), distinguish cells from the background and generate count  
546 tables of unique molecular identifiers (UMIs) for each gene per cell. Intronic counts were  
547 included.

548

### 549 Single-cell DNA-seq and RNA-seq processing

550 Reads sequenced from the genomic DNA libraries were trimmed using Trim Galore (version  
551 0.6.4) (46) and mapped to the human genome build 19 (hg19). Alignment was performed  
552 with bwa mem (version 0.7.17) (47).

553 Hisat2 (version 2.2.1) (48) was used to align the RNAseq data obtained from Smart-Seq2  
554 (49) against a transcriptome reference created from hg19 and ENCODE annotation v19 (50).

555 Afterwards genes and isoforms were quantified using rsem (version 1.3.1) (51) with a single  
556 cell prior.

## 557 Single-cell/nuclei RNA-seq analysis

558 The following data analyses on count matrices from single-cell/nuclei RNA-seq were  
559 performed using the R package Seurat v4.1.0 (52).

### 560 **Quality control**

561 For data generated using the 10X single-nuclei technology, nuclei with fewer than 1000  
562 counts, 300 distinct features or more than 2.5% of reads mapping to mitochondrial genes  
563 were omitted. Sequencing libraries generated with Smart-seq2 (21,22,49) from patients were  
564 filtered by omitting nuclei with fewer than 2500 distinct features or more than 1.5% of reads  
565 mapping to mitochondrial genes. Sequencing libraries generated with Smart-seq2 from cell  
566 lines were filtered by excluding cells with fewer than 5000 distinct features or more than 15%  
567 of reads mapping to mitochondrial genes.

568 The R package DoubletFinder v2.0.3 (53) was used to detect and filter doublets in 10X  
569 single-nuclei samples. Default settings were used and 7.5% doublet rate was estimated  
570 based on the number of recovered cells.

571 Genes present in fewer than five cells were excluded and analysis was restricted to protein-  
572 coding genes.

### 573 **Normalisation of RNA**

574 10X single-nuclei data was normalised using the Seurat function 'NormalizeData' accounting  
575 for sequencing depth, scaling counts to 10,000 and adding a pseudocount of one before  
576 natural-log transformation. Genes were scaled using the Seurat function 'ScaleData' with  
577 mean of 0 and standard deviation of 1 (default).

578

579 Smart-seq2 data was normalised using transcripts per million (TPM), accounting for gene  
580 length and total read count in each cell. For downstream analyses a pseudocount of one  
581 was added and then natural-log transformed.

## 582 **Feature selection and dimension reduction**

583 The Seurat function 'FindVariableGenes' was used to find the top 2000 most variable genes  
584 in each patient and cell line individually. Principal component analysis was performed on  
585 most variable genes and the first 20 components were used to generate the clustering  
586 ('FindClusters') and the uniform manifold approximation and projection (UMAP) embeddings  
587 (resolution of 0.5).

## 588 **Module Scores**

589 To determine the cell cycle phase for each cell, module scores for S-phase and G2M-phase  
590 were estimated from gene sets (30) using the Seurat function 'CellCycleScoring'. Module  
591 scores for mesenchymal and adrenergic state were calculated from published gene sets  
592 (33,34) using the Seurat function 'AddModuleScore'.

## 593 **Cell type annotation**

594 Cell types were annotated per cluster and sample by using marker genes and cell type  
595 annotation curated from (23).

## 596 **Differential gene expression and gene set enrichment analysis**

597 For cells sequenced using the 10X single-nuclei technology, tumour cells were identified and  
598 cells without measured *MYCN* expression were removed.

599 Remaining nuclei in each sample were ranked by their *MYCN* expression level and grouped  
600 by assigning the top 30 percent of cells with highest expression levels the label 'MYCN-high'  
601 and bottom 30 percent of cells with lowest expression the label 'MYCN-low'. All other cells  
602 were annotated as 'MYCN-med' corresponding to intermediate expression levels. The cell  
603 line samples were grouped in the same manner.

604 Differential expression analysis was performed between MYCN-high and MYCN-low cells in  
605 each sample and cell line individually using the Seurat function 'FindMarkers' without

606 logarithmic fold change threshold and a minimum of 5% presence of a feature in the sample  
607 of only regarding protein-coding genes.

608 For GSEA, genes were ranked by their logarithmic fold change in decreasing order. The  
609 enrichment score of MYCN target genes (32) were calculated using the R package fgsea  
610 v1.18 (54). Unsupervised gene set enrichment of all biological processes in the gene  
611 ontology terms was performed using the R package clusterProfiler v4.0.5 (55) function  
612 'gseGO' with a gene set size between 3 and 800 genes and p-values were corrected using  
613 BH. The network of recurrent significant enriched pathways was built using the Add-on  
614 ClueGO v.2.5.9 in Cytoscape v.3.9.1 (56,57).

### 615 **Non negative matrix factorisation and module scores**

616 Transcriptional profiles (modules) for each high-throughput patient sample were determined  
617 by non-negative matrix factorization (NMF) using cNMF v1.4 (25). The input matrix was  
618 restricted to only contain tumour cells and protein-coding genes. The number of modules k  
619 for each sample was determined by running the 'cnmf prepare' command with variable k  
620 equals 5 through 15. The resulting stability and error plots were used as guidance as  
621 described by Kotliar et al., mostly choosing the most stable number of modules. Each  
622 module activity matrix was normalised, so that the sum for each cell equals 1.

623 Pairwise Pearson correlation of module TPM gene score (further as gene score) was  
624 performed to determine similar modules. Modules that showed less than 50% significant  
625 correlation ( $p < 0.05$ ) with other modules were excluded. The remaining modules were  
626 grouped using hierarchical clustering and the number of meta modules was determined by  
627 comparing the heights in the corresponding dendrogram, by choosing the maximum height.  
628 The number of submodules was chosen such that each meta module is divided into at least  
629 2 groups and the height in the dendrogram is the largest under this assumption.

630 Functional association of meta modules and sub modules was determined using the top 10  
631 genes with the highest gene score in each module and ranking those genes by their  
632 frequency among the modules classified as the corresponding meta and sub module. The



633 top 50 genes were evaluated using g:profiler (58) and STRING (59). In addition, GSEA of all  
634 GO-biological processes was performed in each module and the most frequent pathways  
635 with a significant positive NES were evaluated.

636 For meta module representation in UMAP space, the module activity was determined by the  
637 sample specific module activity corresponding to the meta module, in case multiple sample  
638 modules refer to the same meta module, the sum of module activity is displayed.

639 The meta pathway analysis is performed for each meta and sub module separately on the  
640 ranked list of pathways based on the average NES across sample modules in the respective  
641 meta and sub module and uses the set of previously described recurrent significant  
642 pathways as pathway test set.

#### 643 Single-cell DNA-seq analysis

644 The copy number profiles from cells sequenced with G&T-seq were determined using  
645 Ginkgo (36) on the DNA data with bin size 500 kB for CHP212 and TR14 cells and 250 kB  
646 for the patient sample. EcDNA amplicon specific copy number was estimated from the raw  
647 Ginkgo output (Normalised read counts) by leveraging the bins that overlap amplicon  
648 boundaries. Amplicon boundaries were obtained from previous publications (18,22) and  
649 recapitulated in the DNA data. For each cell a step function was determined based on the  
650 raw Ginkgo output and the Ginkgo copy number. Then the step function was applied to the  
651 average read count in the overlapping bins.

652 For the TR14 *MYCN* and *CDK4* amplicon an additional step was included, because of their  
653 overlapping region. The percentage of contributing normalised read count of each amplicon  
654 to the overlapping region was estimated by averaging only unique amplicon bins and  
655 dividing the normalised read count of the unique *MYCN* amplicon by the sum of the unique  
656 *MYCN* and *CDK4* amplicon. The normalised read count in the overlapping region was then  
657 split up with respect to the contributing percentage and was further used to average over the  
658 raw data of the bins overlapping the amplicon regions.

659 Correlation of genomic and transcriptomic content

660 A sample specific linear model was built for each gene present on an ecDNA amplicon using  
661 the lm function in R. The models were built on the G&T-seq data using the gene expression  
662 from RNA-seq and the respective amplicon copy number determined as described above.  
663 The scEC&T-seq data was used to correlate the gene expression with extrachromosomal  
664 (ec) content. Gene specific ec content was determined by binning the genome into 1MB  
665 segments, summing up their reads from EC-seq and overlapping the segment boundaries  
666 with the gene location. The copy number was estimated using gene expression and applying  
667 the gene and sample specific linear model described above.

668 **Declarations**

669 **Ethics approval and consent to participate**

670 Patients were registered and treated according to the trial protocols of the German Society  
671 of Pediatric Oncology and Hematology (GPOH). This study was conducted in accordance  
672 with the World Medical Association Declaration of Helsinki (2013) and good clinical practice;  
673 informed consent was obtained from all patients or their guardians. The collection and use of  
674 patient specimens was approved by the institutional review boards of Charité-  
675 Universitätsmedizin Berlin and the Medical Faculty, University of Cologne.

676 **Consent for publication**

677 Not applicable

678 **Availability of data and materials**

679 The dataset of the Berlin cohort generated and analysed during the current study will be  
680 available in the EGA repository. The other datasets analysed during this study are included  
681 in Janksy et al. (23) and at <https://scpca.alexslomonade.org/>.  
682 Code will be made publicly available on zenodo.

683 **Competing interests**

684 AGH and RK are co-founders of AMZL therapeutics. The remaining authors have no  
685 competing interests to declare.

686 **Acknowledgements and Funding**

687 AGH is supported by the Deutsche Forschungsgemeinschaft (DFG, German Research  
688 Foundation) – 398299703 and by the Deutsche Krebshilfe (German Cancer Aid) Mildred  
689 Scheel Professorship program – 70114107. This project has received funding from the  
690 European Research Council (ERC) under the European Union’s Horizon 2020 research and  
691 innovation programme (grant agreement No. 949172). This project was supported by Cancer  
692 Research UK and the National Institute of Health (398299703, the eDynamic Cancer Grand  
693 Challenge). This project was supported by the Berlin Institute of Health (BIH). Computation  
694 has been performed on the HPC for Research cluster of the Berlin Institute of Health. MCS  
695 is funded by the Deutsche Forschungsgemeinschaft (DFG) via the graduate programme  
696 CompCancer (RTG2424). RFS is a Professor at the Cancer Research Center Cologne  
697 Essen (CCCE) funded by the Ministry of Culture and Science of the State of North Rhine-  
698 Westphalia. This work was partially funded by the German Ministry for Education and  
699 Research as BIFOLD - Berlin Institute for the Foundations of Learning and Data (ref.  
700 01IS18025A and ref 01IS18037A). RCG is supported by a fellowship from the “la Caixa”  
701 Foundation (ID 100010434). The fellowship code is LCF/BQ/EU20/11810051.

702 **Authors' contributions**

703 AGH, KH and RFS contributed to the study and analysis design and supervised the project.  
704 MCS and KH performed the bioinformatic analyses of single-cell sequencing data and data  
705 analysis. MCS, AGH, KH and RFS wrote the manuscript. LB and NW performed FISH  
706 experiments and analysed the data. RCG, TC and NW performed sequencing experiments  
707 and contributed to quality control. RK contributed to study design and analysis of the

708 scEC&T data. AE, JHS and AS contributed clinical specimens. All authors approved the final  
709 version of the manuscript.

## 710 **References**

- 711 1. Mosse YP, Diskin SJ, Wasserman N, Rinaldi K, Attiyeh EF, Cole K, et al.  
712 Neuroblastomas have distinct genomic DNA profiles that predict clinical phenotype and  
713 regional gene expression. *Genes Chromosomes Cancer*. 2007 Oct;46(10):936–49.
- 714 2. Janoueix-Lerosey I, Schleiermacher G, Michels E, Mosseri V, Ribeiro A, Lequin D, et al.  
715 Overall Genomic Pattern Is a Predictor of Outcome in Neuroblastoma. *J Clin Oncol*.  
716 2009 Mar;27(7):1026–33.
- 717 3. Eleveld TF, Oldridge DA, Bernard V, Koster J, Daage LC, Diskin SJ, et al. Relapsed  
718 neuroblastomas show frequent RAS-MAPK pathway mutations. *Nat Genet*. 2015  
719 Aug;47(8):864–71.
- 720 4. Schramm A, Köster J, Assenov Y, Althoff K, Peifer M, Mahlow E, et al. Mutational  
721 dynamics between primary and relapse neuroblastomas. *Nat Genet*. 2015  
722 Aug;47(8):872–7.
- 723 5. Brodeur GM, Seeger RC, Schwab M, Varmus HE, Bishop JM. Amplification of N-myc in  
724 untreated human neuroblastomas correlates with advanced disease stage. *Science*.  
725 1984 Jun 8;224(4653):1121–4.
- 726 6. Koche RP, Rodriguez-Fos E, Helmsauer K, Burkert M, MacArthur IC, Maag J, et al.  
727 Extrachromosomal circular DNA drives oncogenic genome remodeling in  
728 neuroblastoma. *Nat Genet*. 2020 Jan;52(1):29–34.
- 729 7. Gibaud A, Vogt N, Hadj-Hamou NS, Meyniel JP, Hupé P, Debatisse M, et al.  
730 Extrachromosomal amplification mechanisms in a glioma with amplified sequences from  
731 multiple chromosome loci. *Hum Mol Genet*. 2010 Apr 1;19(7):1276–85.
- 732 8. Vogt N, Gibaud A, Lemoine F, de la Grange P, Debatisse M, Malfroy B. Amplicon  
733 rearrangements during the extrachromosomal and intrachromosomal amplification  
734 process in a glioma. *Nucleic Acids Res*. 2014 Dec 1;42(21):13194–205.

- 735 9. Cox D, Yuncken C, Spriggs AI. MINUTE CHROMATIN BODIES IN MALIGNANT  
736 TUMOURS OF CHILDHOOD. *Lancet*. 1965 Oct;1(7402):55–8.
- 737 10. deCarvalho AC, Kim H, Poisson LM, Winn ME, Mueller C, Cherba D, et al. Discordant  
738 inheritance of chromosomal and extrachromosomal DNA elements contributes to  
739 dynamic disease evolution in glioblastoma. *Nat Genet*. 2018 May;50(5):708–17.
- 740 11. Verhaak RGW, Bafna V, Mischel PS. Extrachromosomal oncogene amplification in  
741 tumour pathogenesis and evolution. *Nat Rev Cancer*. 2019 May;19(5):283–8.
- 742 12. Kim H, Zheng S, Amini SS, Virk SM, Mikkelsen T, Brat DJ, et al. Whole-genome and  
743 multisector exome sequencing of primary and post-treatment glioblastoma reveals  
744 patterns of tumor evolution. *Genome Res*. 2015 Mar;25(3):316–27.
- 745 13. Kim H, Nguyen NP, Turner K, Wu S, Gujar AD, Luebeck J, et al. Extrachromosomal  
746 DNA is associated with oncogene amplification and poor outcome across multiple  
747 cancers. *Nat Genet [Internet]*. 2020; Available from: [https://doi.org/10.1038/s41588-020-](https://doi.org/10.1038/s41588-020-0678-2)  
748 [0678-2](https://doi.org/10.1038/s41588-020-0678-2)
- 749 14. Nathanson DA, Gini B, Mottahedeh J, Visnyei K, Koga T, Gomez G, et al. Targeted  
750 therapy resistance mediated by dynamic regulation of extrachromosomal mutant EGFR  
751 DNA. *Science*. 2014 Mar;343(6166):72–6.
- 752 15. Wu S, Turner KM, Nguyen N, Raviram R, Erb M, Santini J, et al. Circular ecDNA  
753 promotes accessible chromatin and high oncogene expression. *Nature*. 2019  
754 Nov;575(7784):699–703.
- 755 16. Turner KM, Deshpande V, Beyter D, Koga T, Rusert J, Lee C, et al. Extrachromosomal  
756 oncogene amplification drives tumour evolution and genetic heterogeneity. *Nature*. 2017  
757 Feb;543(7643):122–5.
- 758 17. Deshpande V, Luebeck J, Nguyen NPD, Bakhtiari M, Turner KM, Schwab R, et al.  
759 Exploring the landscape of focal amplifications in cancer using AmpliconArchitect. *Nat*  
760 *Commun*. 2019;10(1):392.
- 761 18. Helmsauer K, Valieva ME, Ali S, González RC, Schöpflin R, Röefzaad C, et al. Enhancer  
762 hijacking determines extrachromosomal circular MYCN amplicon architecture in

- 763 neuroblastoma. *Nat Commun.* 2020;11(1):1–12.
- 764 19. Morton AR, Dogan-Artun N, Faber ZJ, MacLeod G, Bartels CF, Piazza MS, et al.  
765 Functional Enhancers Shape Extrachromosomal Oncogene Amplifications. *Cell.*  
766 2019;179(6):1330-1341.e13.
- 767 20. Lange JT, Rose JC, Chen CY, Pichugin Y, Xie L, Tang J, et al. The evolutionary  
768 dynamics of extrachromosomal DNA in human cancers. *Nat Genet.* 2022 Sep 19;1–7.
- 769 21. Macaulay IC, Haerty W, Kumar P, Li YI, Hu TX, Teng MJ, et al. G&T-seq: parallel  
770 sequencing of single-cell genomes and transcriptomes. *Nat Methods.* 2015  
771 Jun;12(6):519–22.
- 772 22. Rocío Chamorro González, Thomas Conrad, Maja Stöber, Robin Xu, Kerstin Haase,  
773 Richard Koche, et al. Parallel sequencing of extrachromosomal circular DNAs and  
774 transcriptomes in single cancer cells. *Rev.*
- 775 23. Jansky S, Sharma AK, Körber V, Quintero A, Toprak UH, Wecht EM, et al. Single-cell  
776 transcriptomic analyses provide insights into the developmental origins of  
777 neuroblastoma. *Nat Genet.* 2021 May;53(5):683–93.
- 778 24. Dong R, Yang R, Zhan Y, Lai HD, Ye CJ, Yao XY, et al. Single-Cell Characterization of  
779 Malignant Phenotypes and Developmental Trajectories of Adrenal Neuroblastoma.  
780 *Cancer Cell [Internet].* 2020; Available from:  
781 <http://www.sciencedirect.com/science/article/pii/S1535610820304256>
- 782 25. Kotliar D, Veres A, Nagy MA, Tabrizi S, Hodis E, Melton DA, et al. Identifying gene  
783 expression programs of cell-type identity and cellular activity with single-cell RNA-Seq.  
784 Valencia A, Barkai N, Mereu E, Göttgens B, editors. *eLife.* 2019 Jul 8;8:e43803.
- 785 26. Barkley D, Moncada R, Pour M, Liberman DA, Dryg I, Werba G, et al. Recurrence of  
786 cancer cell states across diverse tumors and their interactions with the microenvironment  
787 [Internet]. *bioRxiv*; 2021 [cited 2022 Sep 1]. p. 2021.12.20.473565. Available from:  
788 <https://www.biorxiv.org/content/10.1101/2021.12.20.473565v1>
- 789 27. Boon K, Caron HN, van Asperen R, Valentijn L, Hermus MC, van Sluis P, et al. N-myc  
790 enhances the expression of a large set of genes functioning in ribosome biogenesis and

- 791 protein synthesis. *EMBO J.* 2001 Mar 15;20(6):1383–93.
- 792 28. Hald ØH, Olsen L, Gallo-Oller G, Elfman LHM, Løkke C, Kogner P, et al. Inhibitors of  
793 ribosome biogenesis repress the growth of MYCN-amplified neuroblastoma. *Oncogene.*  
794 2019 Apr;38(15):2800–13.
- 795 29. Dzieran J, Rodriguez Garcia A, Westermarck UK, Henley AB, Eyre Sánchez E, Träger C,  
796 et al. MYCN-amplified neuroblastoma maintains an aggressive and undifferentiated  
797 phenotype by deregulation of estrogen and NGF signaling. *Proc Natl Acad Sci.* 2018  
798 Feb 6;115(6):E1229–38.
- 799 30. Tirosh I, Izar B, Prakadan SM, Wadsworth MH, Treacy D, Trombetta JJ, et al. Dissecting  
800 the multicellular ecosystem of metastatic melanoma by single-cell RNA-seq. *Science.*  
801 2016 Apr 8;352(6282):189–96.
- 802 31. Galderisi U, Di Bernardo G, Cipollaro M, Peluso G, Cascino A, Cotrufo R, et al.  
803 Differentiation and apoptosis of neuroblastoma cells: Role of N-myc gene product. *J Cell*  
804 *Biochem.* 1999;73(1):97–105.
- 805 32. Westermann F, Muth D, Benner A, Bauer T, Henrich KO, Oberthuer A, et al. Distinct  
806 transcriptional MYCN/c-MYC activities are associated with spontaneous regression or  
807 malignant progression in neuroblastomas. *Genome Biol.* 2008;9(10):R150.
- 808 33. Boeva V, Louis-Brennetot C, Peltier A, Durand S, Pierre-Eugène C, Raynal V, et al.  
809 Heterogeneity of neuroblastoma cell identity defined by transcriptional circuitries. *Nat*  
810 *Genet.* 2017 Sep;49(9):1408–13.
- 811 34. van Groningen T, Koster J, Valentijn LJ, Zwijnenburg DA, Akogul N, Hasselt NE, et al.  
812 Neuroblastoma is composed of two super-enhancer-associated differentiation states.  
813 *Nat Genet.* 2017 Aug;49(8):1261–6.
- 814 35. Yi E, Gujar AD, Guthrie M, Kim H, Zhao D, Johnson KC, et al. Live-Cell Imaging Shows  
815 Uneven Segregation of Extrachromosomal DNA Elements and Transcriptionally Active  
816 Extrachromosomal DNA Hubs in Cancer. *Cancer Discov.* 2022 Feb;12(2):468–83.
- 817 36. Garvin T, Aboukhalil R, Kendall J, Baslan T, Atwal GS, Hicks J, et al. Interactive analysis  
818 and assessment of single-cell copy-number variations. *Nat Methods.* 2015

- 819 Nov;12(11):1058–60.
- 820 37. Calabrese C, Davidson NR, Demircioğlu D, Fonseca NA, He Y, Kahles A, et al. Genomic  
821 basis for RNA alterations in cancer. *Nature*. 2020 Feb;578(7793):129–36.
- 822 38. Hung KL, Yost KE, Xie L, Wu S, Lange JT, Duffy CV, et al. EcDNA hubs drive  
823 cooperative intermolecular oncogene expression [Internet]. Cold Spring Harbor  
824 Laboratory. 2020. Available from:  
825 <https://www.biorxiv.org/content/10.1101/2020.11.19.390278v1>
- 826 39. Zhou YH, Chen Y, Hu Y, Yu L, Tran K, Giedzinski E, et al. The role of EGFR double  
827 minutes in modulating the response of malignant gliomas to radiotherapy. *Oncotarget*.  
828 2017 Sep 8;8(46):80853–68.
- 829 40. Peirce SK, Findley HW. High level MycN expression in non-MYCN amplified  
830 neuroblastoma is induced by the combination treatment nutlin-3 and doxorubicin and  
831 enhances chemosensitivity. *Oncol Rep*. 2009 Dec;22(6):1443–9.
- 832 41. Ryl T, Kuchen EE, Bell E, Shao C, Flórez AF, Mönke G, et al. Cell-Cycle Position of  
833 Single MYC-Driven Cancer Cells Dictates Their Susceptibility to a Chemotherapeutic  
834 Drug. *Cell Syst*. 2017 Sep;5(3):237-250.e8.
- 835 42. Ding J, Adiconis X, Simmons SK, Kowalczyk MS, Hession CC, Marjanovic ND, et al.  
836 Systematic comparison of single-cell and single-nucleus RNA-sequencing methods. *Nat*  
837 *Biotechnol*. 2020 Jun;38(6):737–46.
- 838 43. Bakken TE, Hodge RD, Miller JA, Yao Z, Nguyen TN, Aebermann B, et al. Single-  
839 nucleus and single-cell transcriptomes compared in matched cortical cell types. *PLOS*  
840 *ONE*. 2018 Dec 26;13(12):e0209648.
- 841 44. Lake BB, Codeluppi S, Yung YC, Gao D, Chun J, Kharchenko PV, et al. A comparative  
842 strategy for single-nucleus and single-cell transcriptomes confirms accuracy in predicted  
843 cell-type expression from nuclear RNA. *Sci Rep*. 2017 Jul 20;7(1):6031.
- 844 45. Zheng GXY, Terry JM, Belgrader P, Ryvkin P, Bent ZW, Wilson R, et al. Massively  
845 parallel digital transcriptional profiling of single cells. *Nat Commun*. 2017 Apr;8(1):14049.
- 846 46. Krueger F, James F, Ewels P, Afyounian E, Schuster-Boeckler B.



- 847 FelixKrueger/TrimGalore: v0.6.7 - DOI via Zenodo [Internet]. Zenodo; 2021 [cited 2022  
848 Dec 19]. Available from: <https://zenodo.org/record/5127899>
- 849 47. Li H. Aligning sequence reads, clone sequences and assembly contigs with BWA-MEM  
850 [Internet]. arXiv; 2013 [cited 2022 Dec 19]. Available from: <http://arxiv.org/abs/1303.3997>
- 851 48. Kim D, Paggi JM, Park C, Bennett C, Salzberg SL. Graph-based genome alignment and  
852 genotyping with HISAT2 and HISAT-genotype. *Nat Biotechnol*. 2019 Aug;37(8):907–15.
- 853 49. Picelli S, Björklund ÅK, Faridani OR, Sagasser S, Winberg G, Sandberg R. Smart-seq2  
854 for sensitive full-length transcriptome profiling in single cells. *Nat Methods*. 2013  
855 Nov;10(11):1096–8.
- 856 50. Davis CA, Hitz BC, Sloan CA, Chan ET, Davidson JM, Gabdank I, et al. The  
857 Encyclopedia of DNA elements (ENCODE): data portal update. *Nucleic Acids Res*. 2018  
858 Jan 4;46(D1):D794–801.
- 859 51. Li B, Dewey CN. RSEM: accurate transcript quantification from RNA-Seq data with or  
860 without a reference genome. *BMC Bioinformatics*. 2011 Aug 4;12(1):323.
- 861 52. Hao Y, Hao S, Andersen-Nissen E, Mauck WM, Zheng S, Butler A, et al. Integrated  
862 analysis of multimodal single-cell data. *Cell*. 2021 Jun 24;184(13):3573-3587.e29.
- 863 53. McGinnis CS, Murrow LM, Gartner ZJ. DoubletFinder: Doublet Detection in Single-Cell  
864 RNA Sequencing Data Using Artificial Nearest Neighbors. *Cell Syst*. 2019 Apr  
865 24;8(4):329-337.e4.
- 866 54. Korotkevich G, Sukhov V, Budin N, Shpak B, Artyomov MN, Sergushichev A. Fast gene  
867 set enrichment analysis [Internet]. bioRxiv; 2021 [cited 2022 Sep 1]. p. 060012. Available  
868 from: <https://www.biorxiv.org/content/10.1101/060012v3>
- 869 55. Wu T, Hu E, Xu S, Chen M, Guo P, Dai Z, et al. clusterProfiler 4.0: A universal  
870 enrichment tool for interpreting omics data. *The Innovation*. 2021 Aug 28;2(3):100141.
- 871 56. Shannon P, Markiel A, Ozier O, Baliga NS, Wang JT, Ramage D, et al. Cytoscape: a  
872 software environment for integrated models of biomolecular interaction networks.  
873 *Genome Res*. 2003 Nov;13(11):2498–504.
- 874 57. Bindea G, Mlecnik B, Hackl H, Charoentong P, Tosolini M, Kirilovsky A, et al. ClueGO: a

875 Cytoscape plug-in to decipher functionally grouped gene ontology and pathway  
876 annotation networks. *Bioinformatics*. 2009 Apr 15;25(8):1091–3.  
877 58. Raudvere U, Kolberg L, Kuzmin I, Arak T, Adler P, Peterson H, et al. g:Profiler: a web  
878 server for functional enrichment analysis and conversions of gene lists (2019 update).  
879 *Nucleic Acids Res*. 2019 Jul 2;47(W1):W191–8.  
880 59. Szklarczyk D, Gable AL, Lyon D, Junge A, Wyder S, Huerta-Cepas J, et al. STRING  
881 v11: protein-protein association networks with increased coverage, supporting functional  
882 discovery in genome-wide experimental datasets. *Nucleic Acids Res*. 2019 Jan  
883 8;47(D1):D607–13.

884

## 885 **Additional Files**

### 886 Additional File 1

887 Word document (.docx)

888 Supplementary Figures

889 Supplementary Figure1a: UMAPs per patient, cell type annotation and MYCN level

890 Supplementary Figure1b: Barplot of heights in dendrogram

891 Supplementary Figure1c: Boxplot of correlation between MYCN expression and module  
892 activity grouped by submodule

893 Supplementary Figure1d: UMAP of patient1 coloured by cell cycle phase

894 Supplementary Figure1e: Barplot of MYCN group per sample coloured by cell cycle phase

895 Supplementary Figure1f: Boxplot of MES and ADRN score for each patient

896 Supplementary Figure2a: FISH images uncombined (interphase and metaphase)

897 Supplementary Figure2b: Patient amplicon

898 Supplementary Figure2c: Patient copy number count

899 Supplementary Figure2d: Patient MYCN CN vs expression plot

900 Supplementary Figure3a/b: Correlation copy number gene expression for all genes on  
901 amplicon in CHP212 and TR14

902 Supplementary Figure3c: Correlation EC-Seq reads and gene expression

903 Supplementary Figure3d: GSEA of MYCN target genes for TR14 cells

904

905 [Additional File 2](#)

906 Excel spreadsheet (.xlsx)

907 Supplementary Tables

908 Table S1: Patient meta data including QC statistics

909 Table S2: Meta data per cell including cell cycle phase, cell type, mesenchymal and

910 adrenergic score

911 Table S3: List of top 10 gene scores per NMF module

912 Table S4: DEG between MYCN-high and MYCN-low per patient

913 Table S6: Cell line copy number and gene expression of oncogenes

914 Table S7: Patient 8 GnT-seq copy number and gene expression of *MYCN*

915 Table S8: Linear model of oncogenes in CHP212 and TR14

916 Table S9: DEG between MYCN-high and MYCN-low in CHP212

917 Table S10: DEG between MYCN-high and MYCN-low in TR14

918 Table S11: GSEA results of 38 recurring pathways in CHP212 and TR14

919

920 [Additional File 3](#)

921 Excel spreadsheet (.xlsx)

922 Supplementary Table

923 Table S5: GSEA results for patients

924

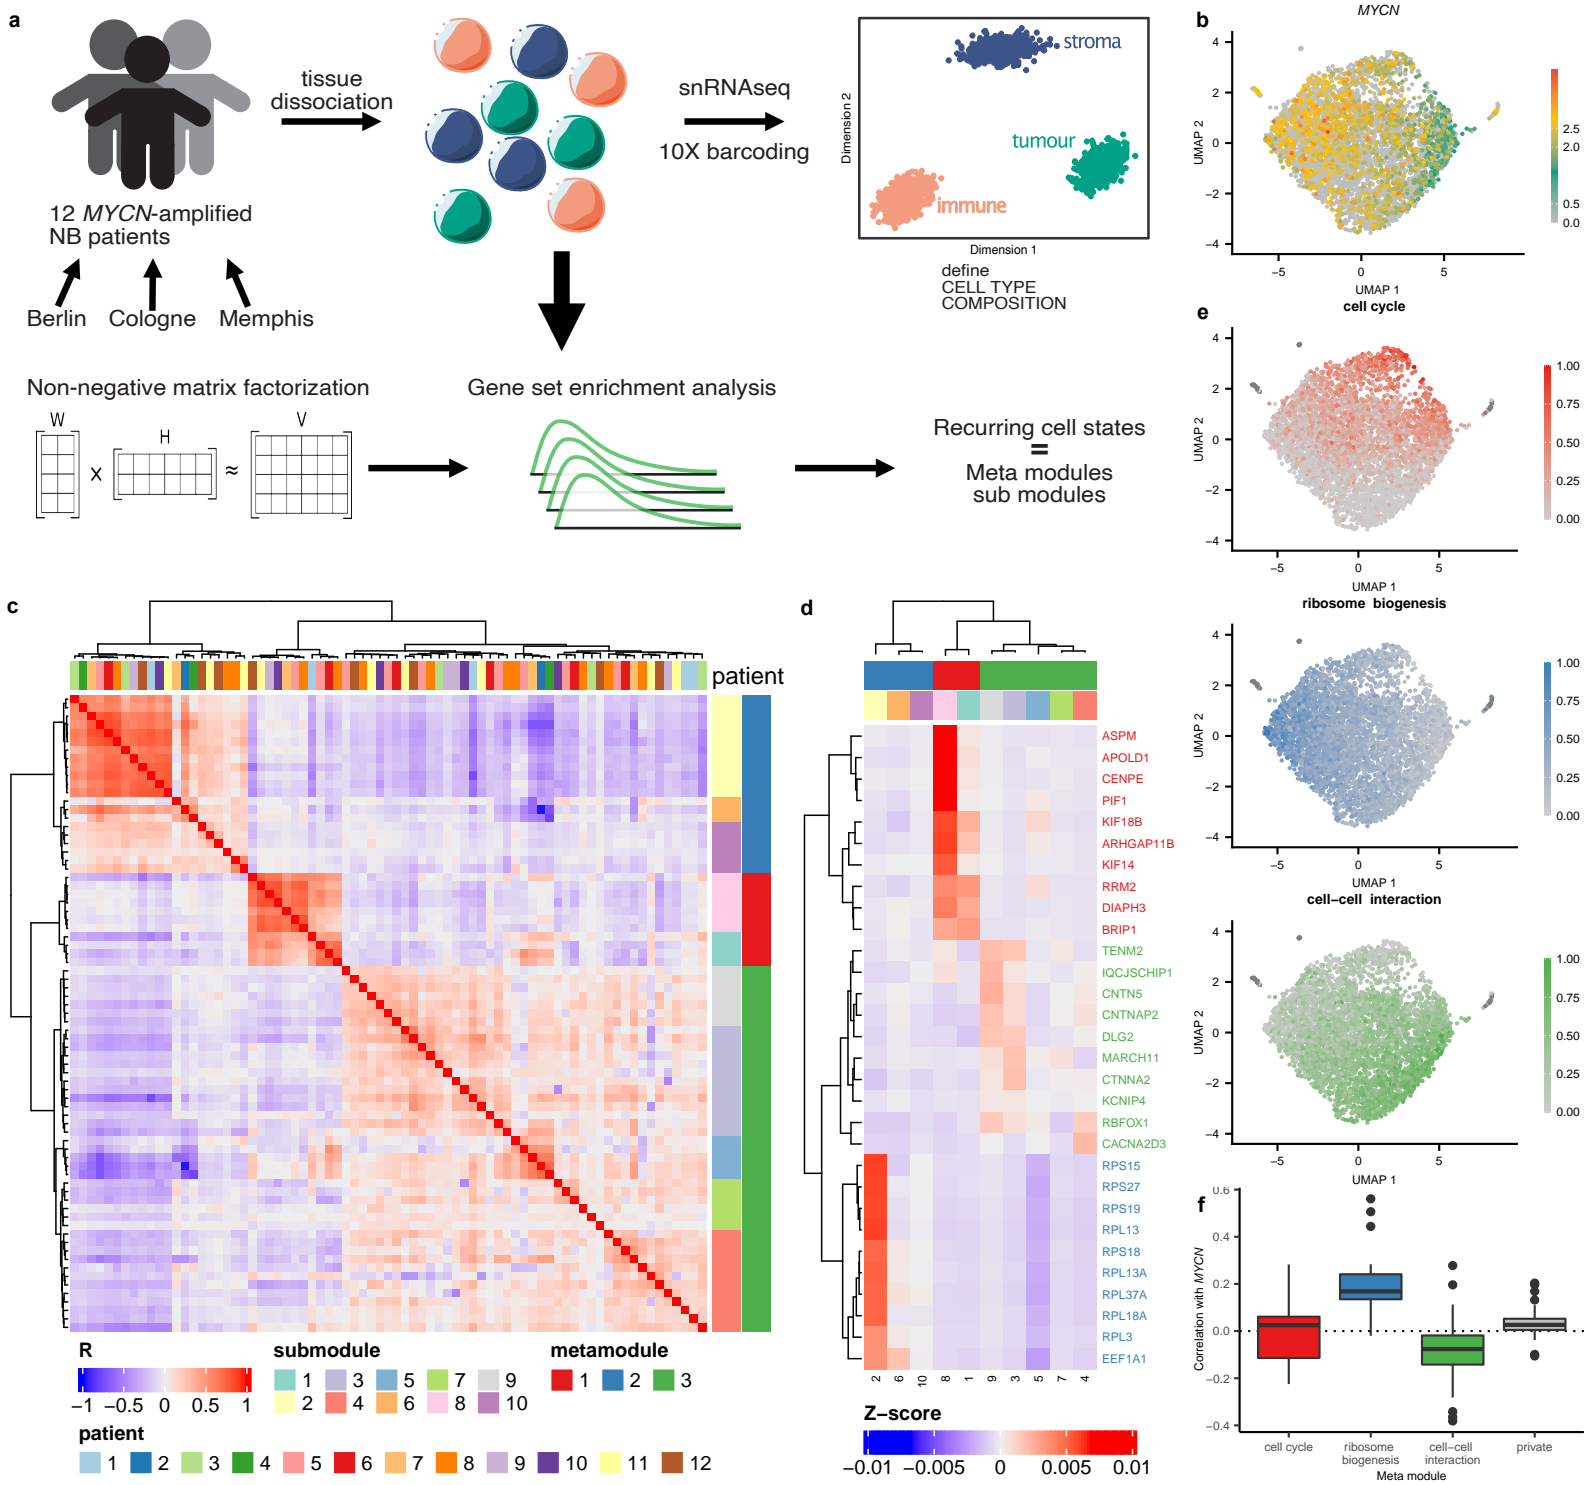

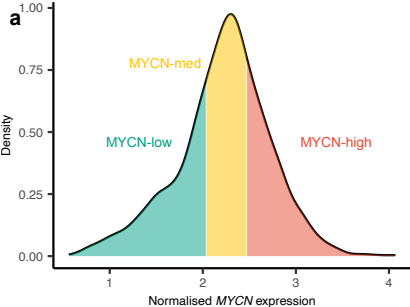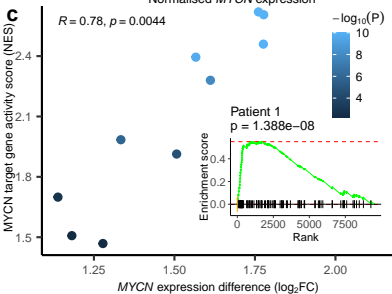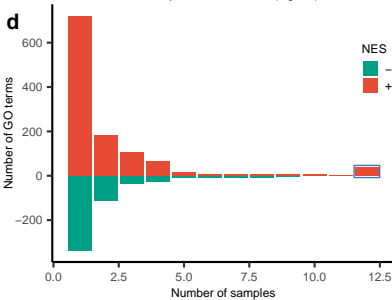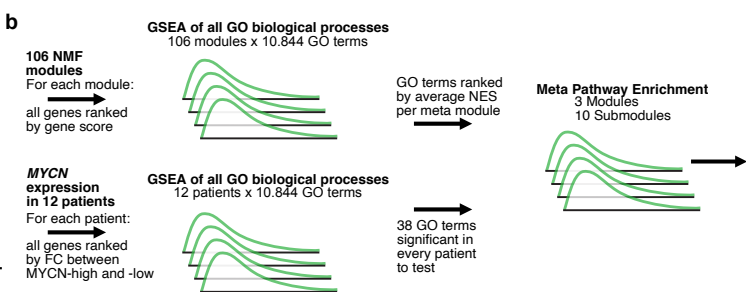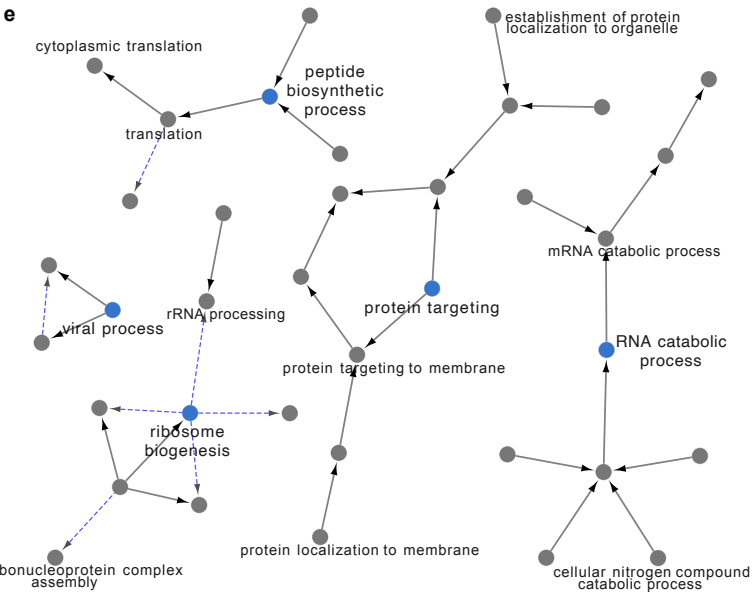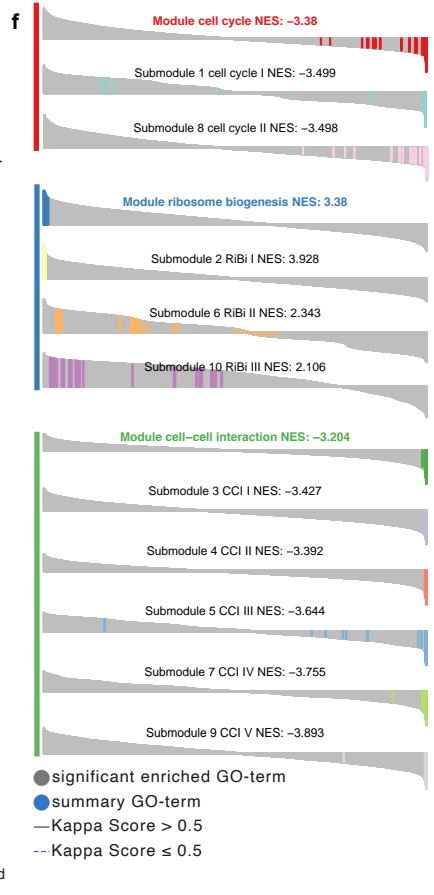

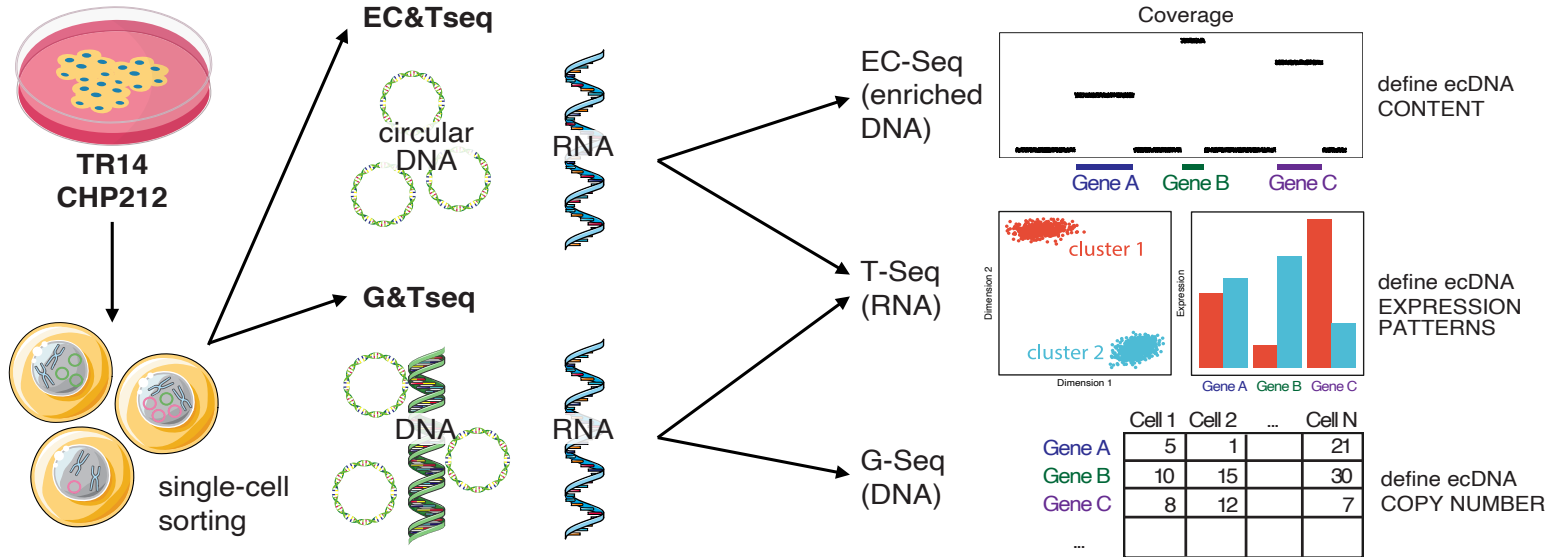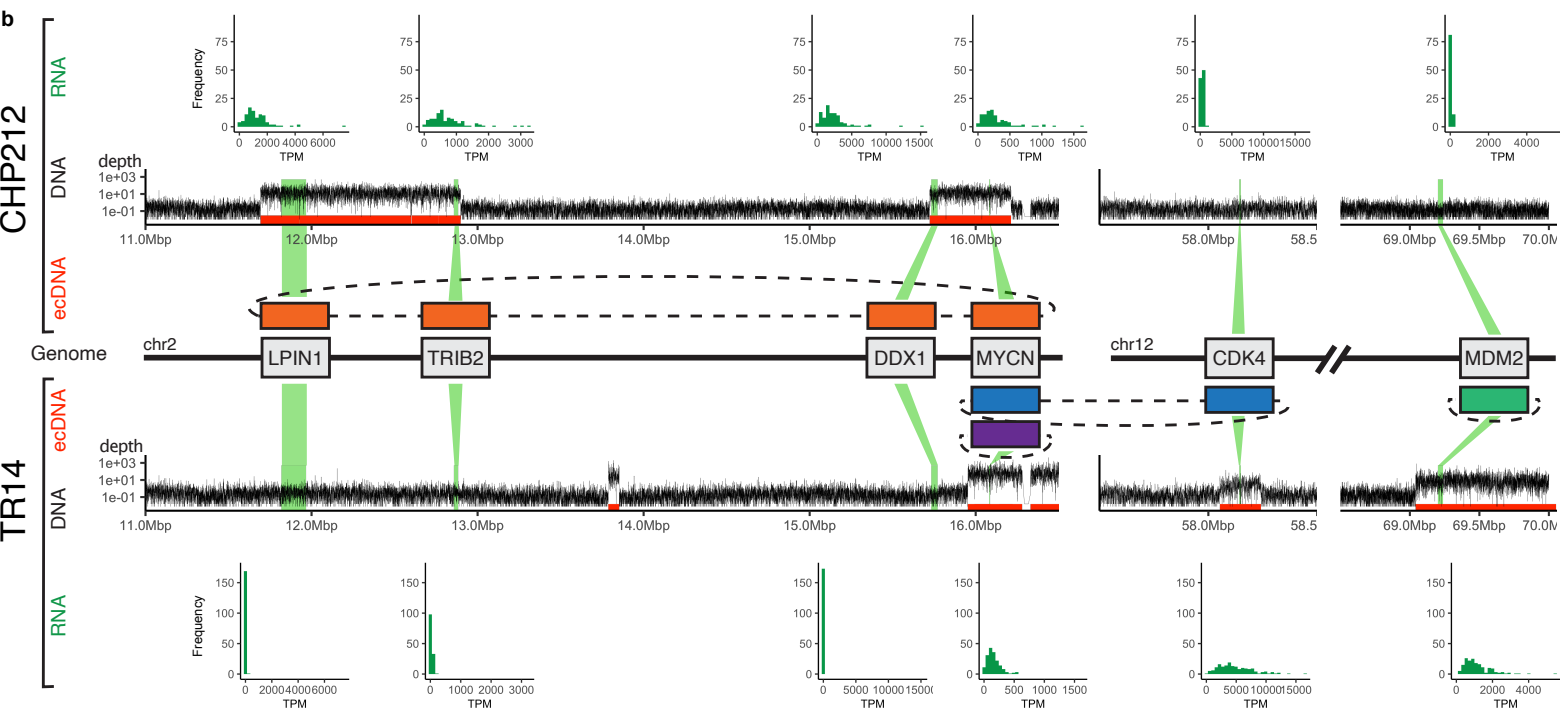

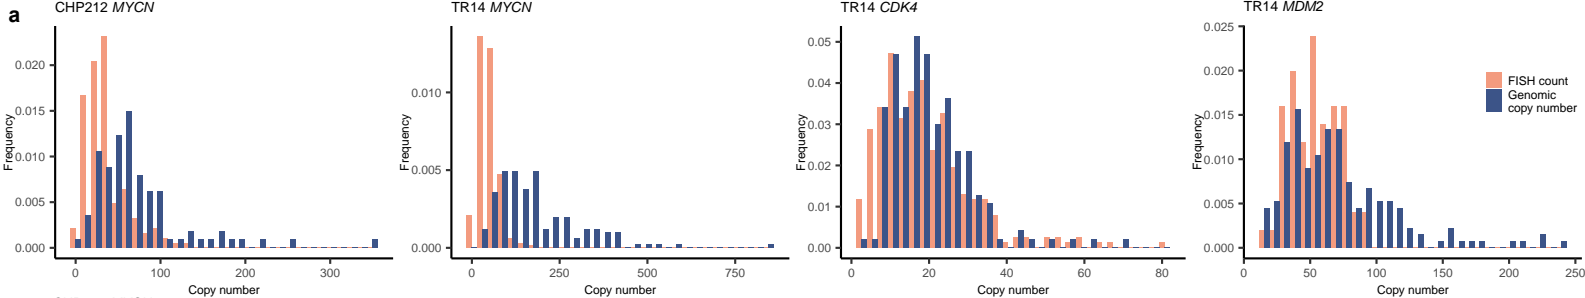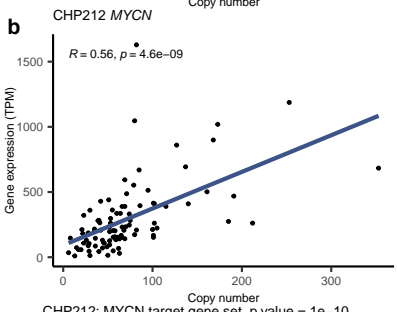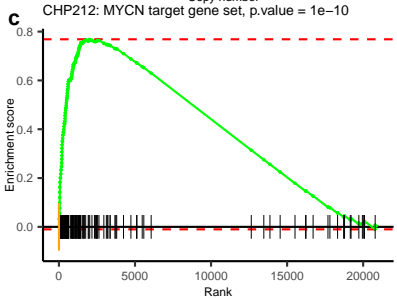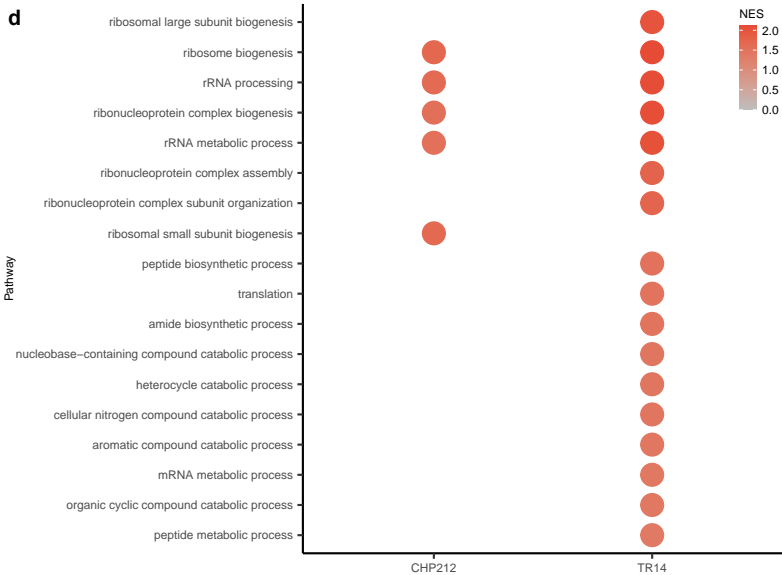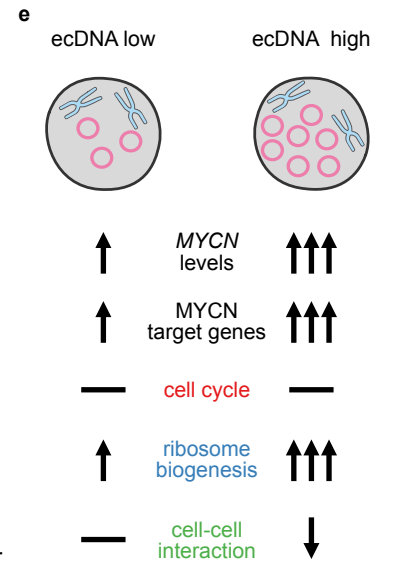

Source: https://www.biorxiv.org/content/10.1101/2023.01.21.525014v1.full.pdf
